# Supplementary material for: Influence of the stoichiometry of tin-based 2D/3D perovskite active layers on solar cell performance
Source: Royal Society of Chemistry journal article supplement (doi:10.1039/d0ta10277f), 2021-01-01
Supplement: d0ta10277f1.pdf [file d0ta10277f1.pdf]

## Supporting Information

### Influence of the Stoichiometry of tin-based 2D/3D Perovskite active layer on Solar Cells performances

Shuyan Shao<sup>\*,a</sup>, Maykel Nijenhuis<sup>a</sup>, Jingjin Dong<sup>b</sup>, Simon Kahmann<sup>a</sup>, Gert H. ten Brink<sup>c</sup>,  
Giuseppe Portale<sup>b</sup>, Maria Antonietta Loi<sup>\*,a</sup>

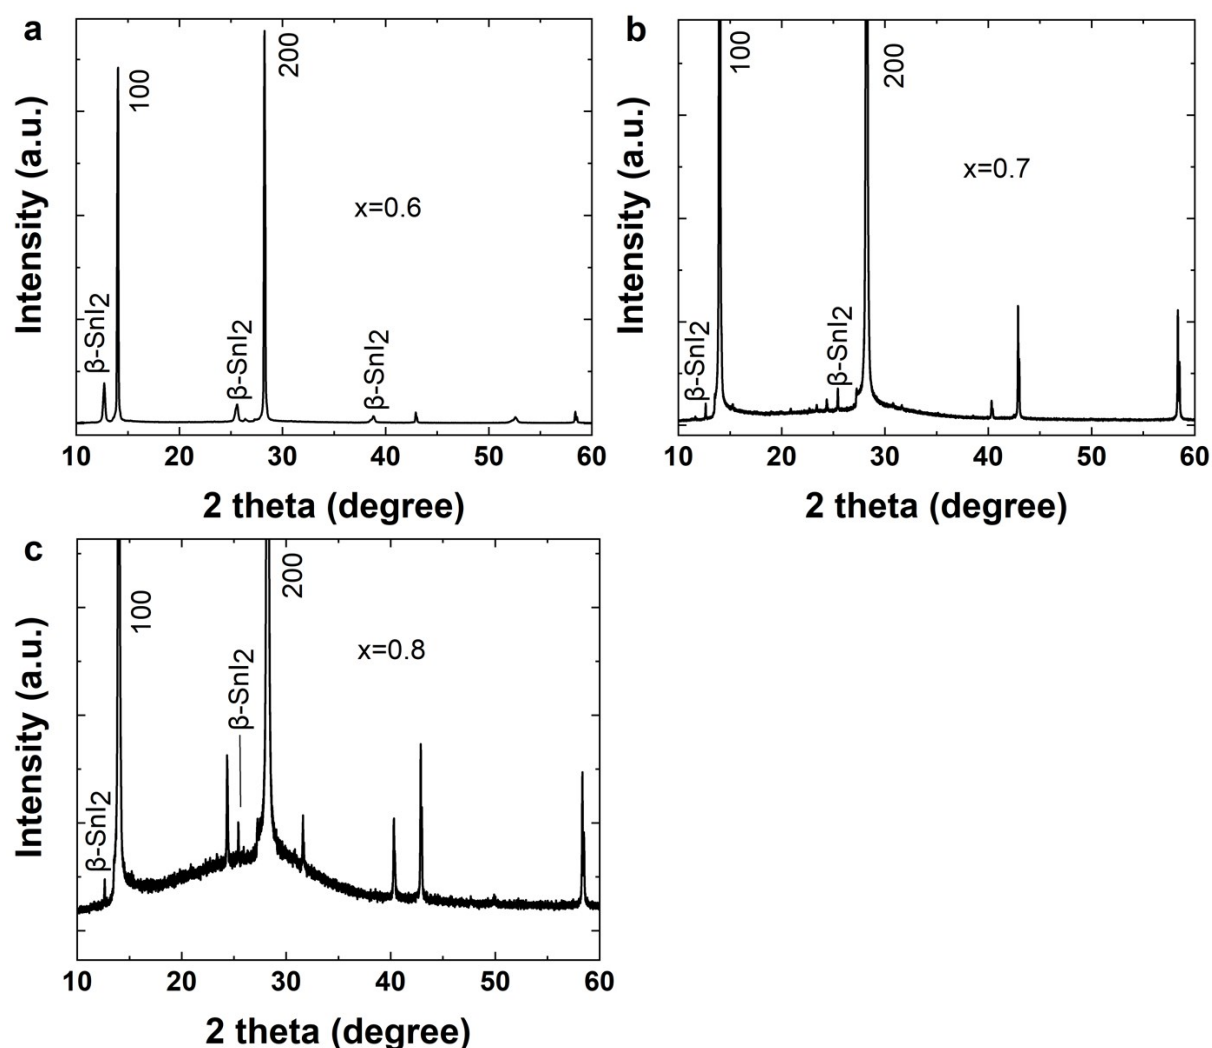

**Figure S1.** XRD patterns of (a) a  $\text{PEA}_{0.08}\text{FA}_{0.6}\text{SnI}_3$  film with hexagonal  $\text{SnI}_2$  ( $\beta\text{-SnI}_2$ ) peaks at 12.7°, 25.6°, and 38.8°, (b) a  $\text{PEA}_{0.08}\text{FA}_{0.7}\text{SnI}_3$  film with  $\beta\text{-SnI}_2$  peaks at 12.7° and 25.6° and (c) a  $\text{PEA}_{0.08}\text{FA}_{0.8}\text{SnI}_3$  film with  $\beta\text{-SnI}_2$  peaks at 12.7° and 25.6° as well [1].

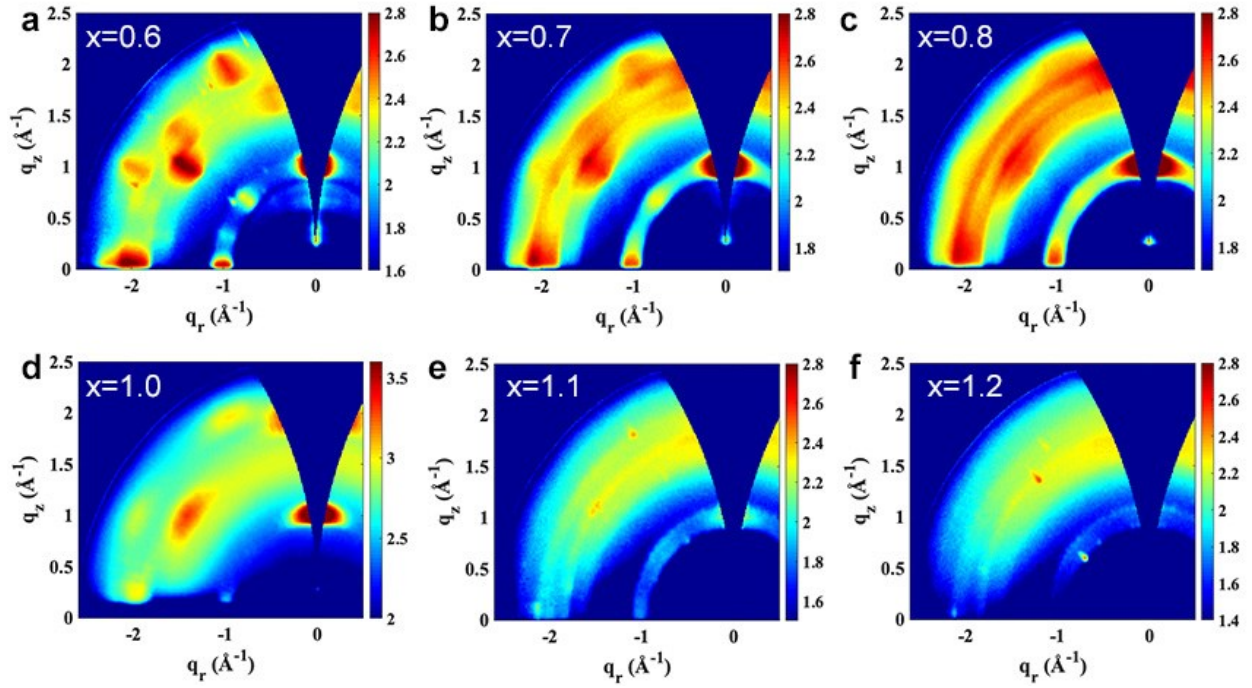

**Figure S2.** GIWAXS patterns of PEA<sub>0.08</sub>FA<sub>(x)</sub>SnI<sub>3</sub> films. The images were recorded using an incident angle of 0.25°.

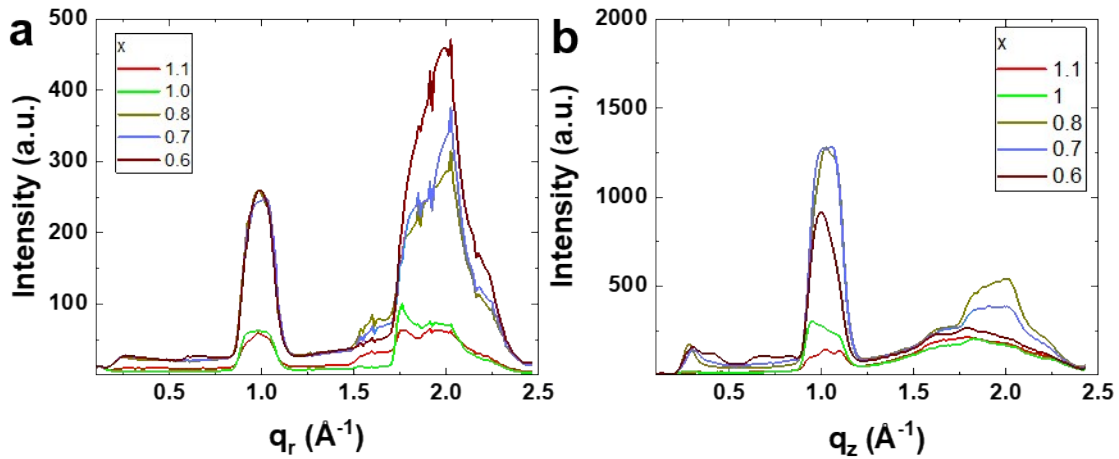

**Figure S3.** The line-cut data in (a) in-plane ( $q_z$ ) and (b) out-of-plane ( $q_r$ ) of the GIWAXS images of the PEA<sub>0.08</sub>FA<sub>x</sub>SnI<sub>3</sub> films with X-ray incident angle of 0.25°, respectively.

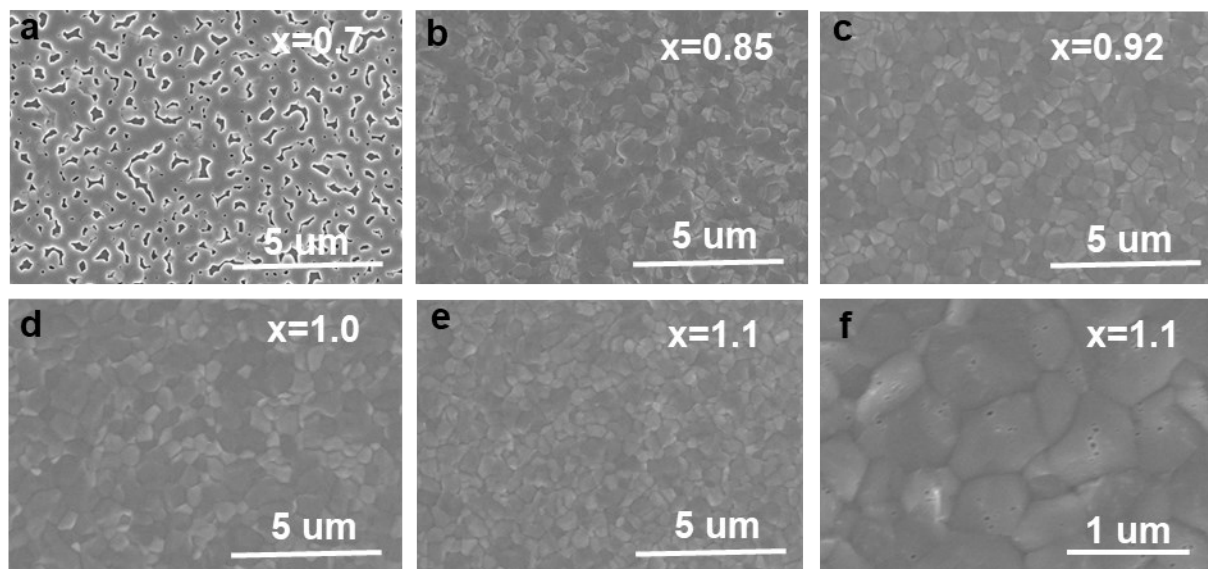

Figure S4. SEM images of the  $\text{PEA}_{0.08}\text{FA}_x\text{SnI}_3$  films: (a)  $x=0.7$ , (b)  $x=0.85$ , (c)  $x=0.92$ , (d)  $x=1.0$ , (e)  $x=1.1$ , (f) the magnified image of  $x=1.1$  sample.

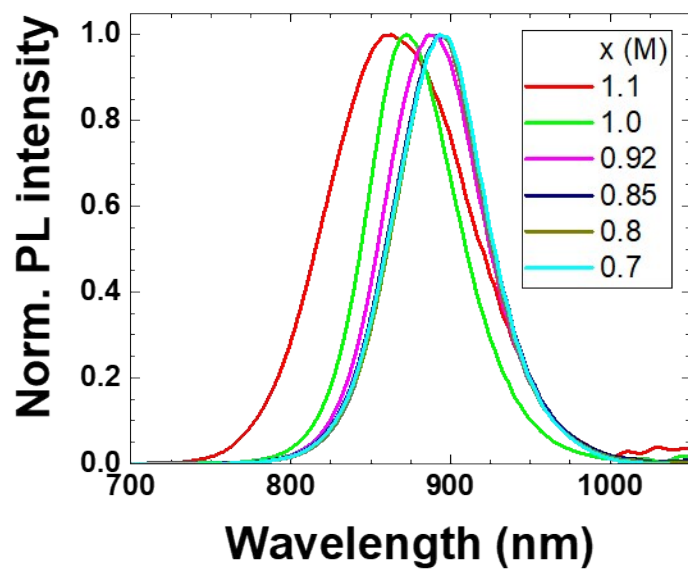

Figure S5. Normalized PL spectra of  $\text{PEA}_{0.08}\text{FA}_{(x)}\text{SnI}_3$  films.

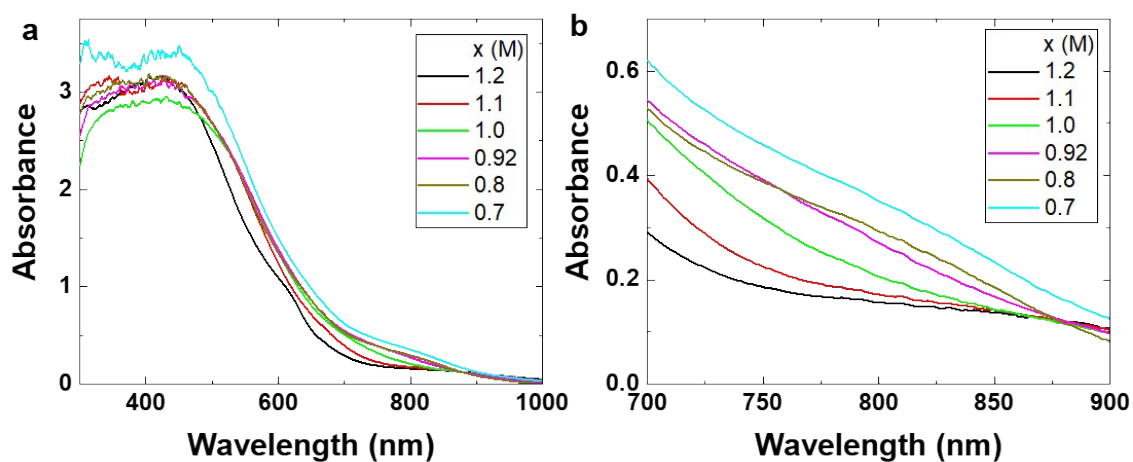

**Figure S6.** Absorbance of PEA<sub>0.08</sub>FA<sub>(x)</sub>SnI<sub>3</sub> films (a) with an incident light wavelength from 350 nm to 1000 nm and (b) from 700 nm to 900 nm. Note: the absorbance spectra in the short wavelength region (<600 nm) are saturated.

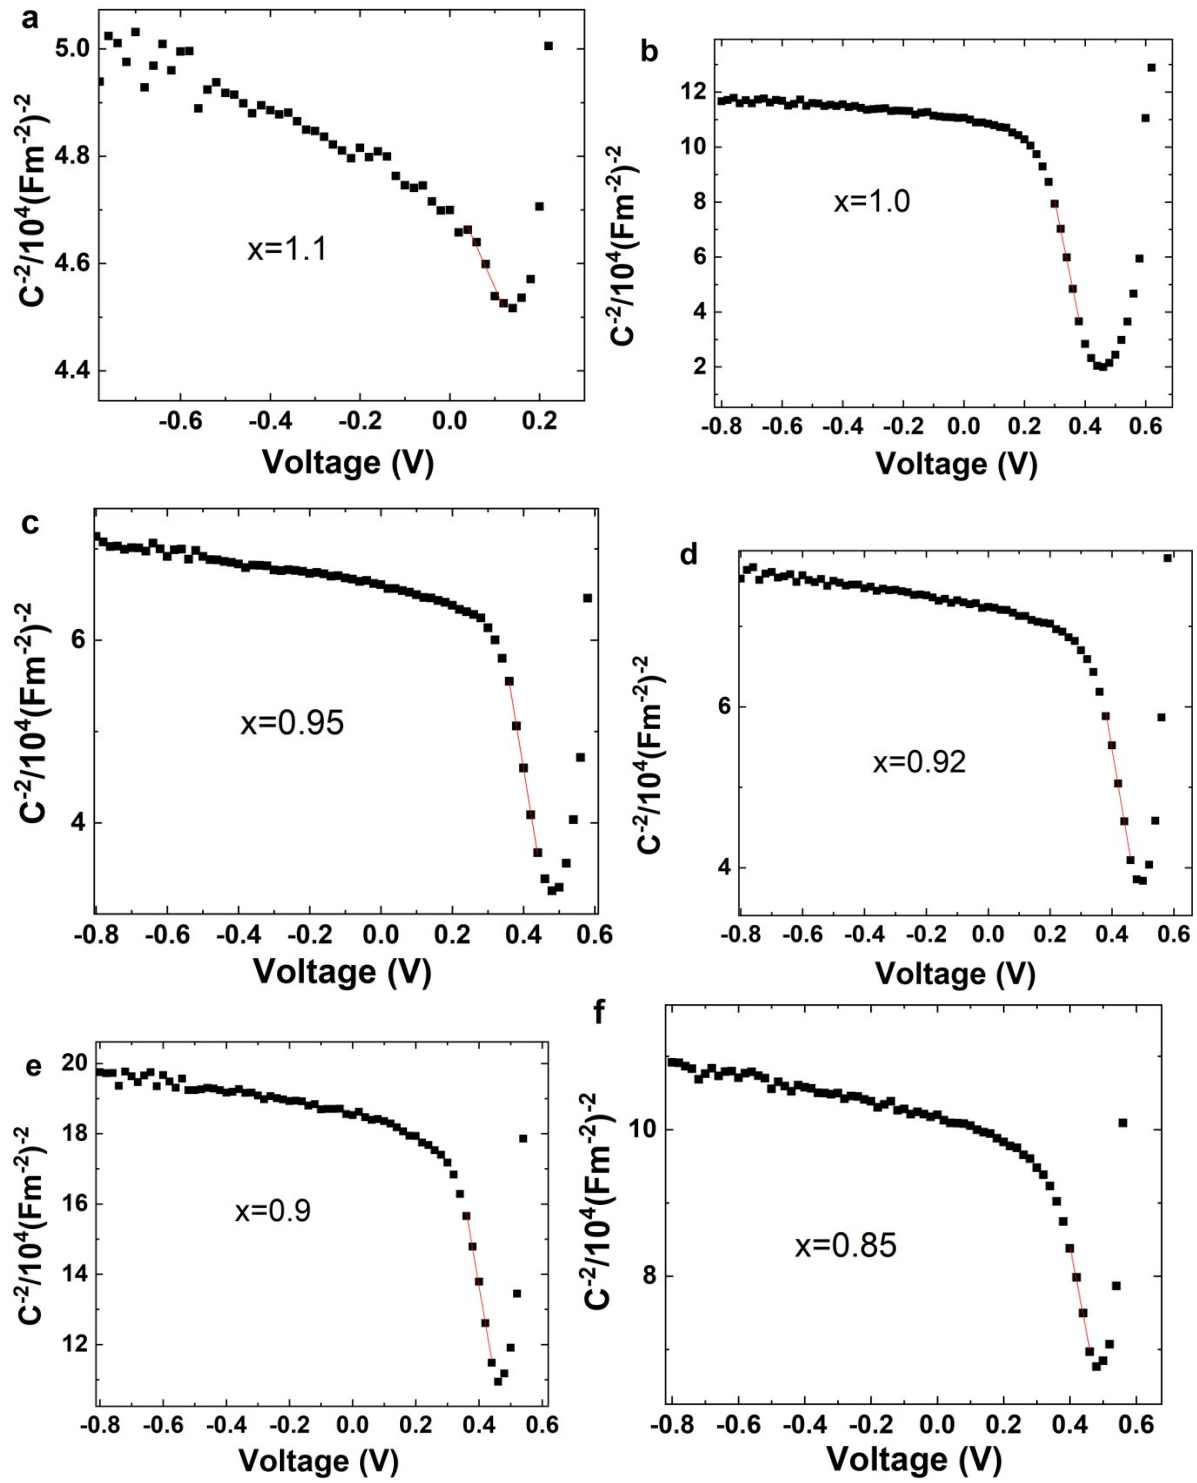

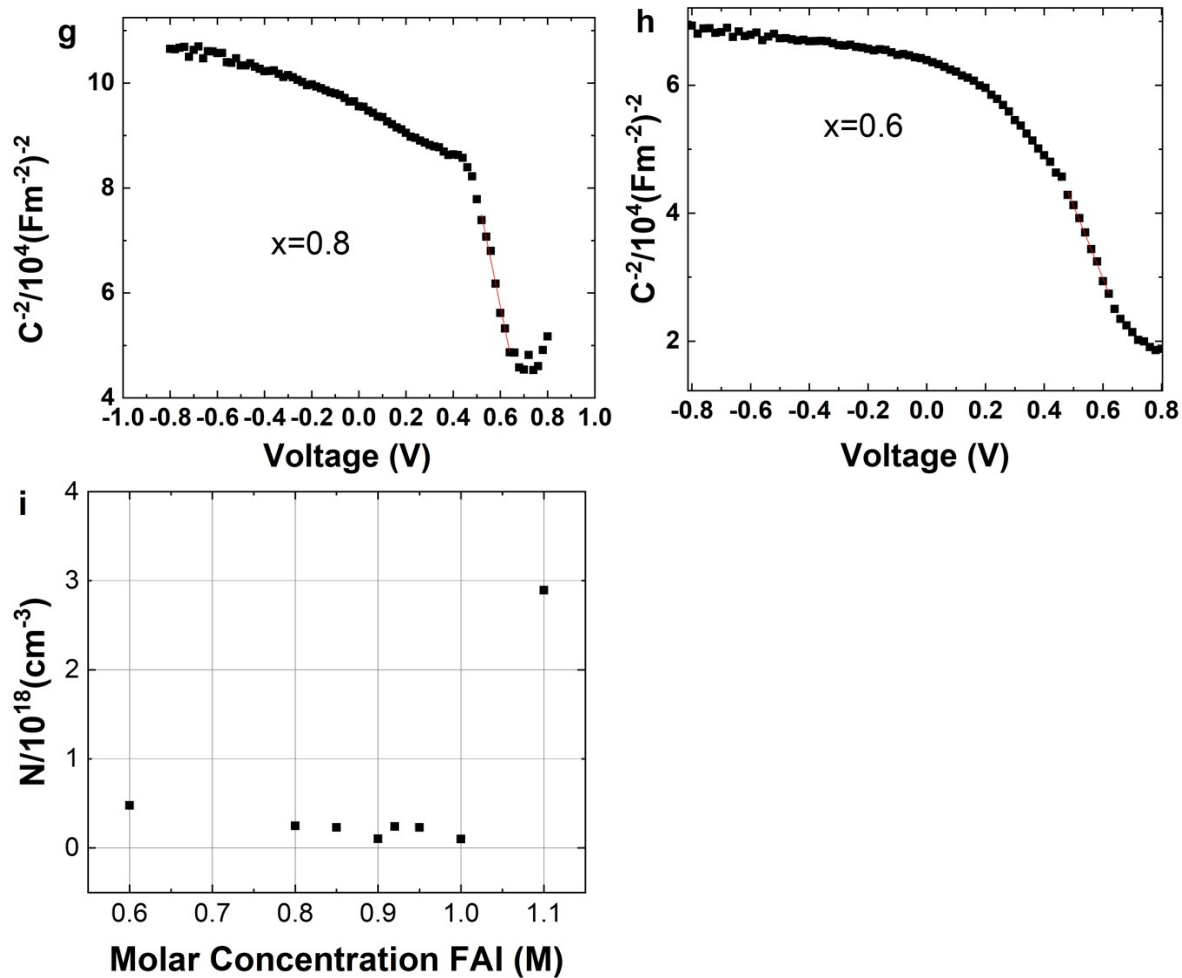

**Figure S7.** Mott-Schottky analysis of perovskite solar cells of different stoichiometry. (a-h)  $C^{-2}$  as a function of bias voltage. (i) carrier concentration as derived from Mott-Schottky analysis for the different samples.

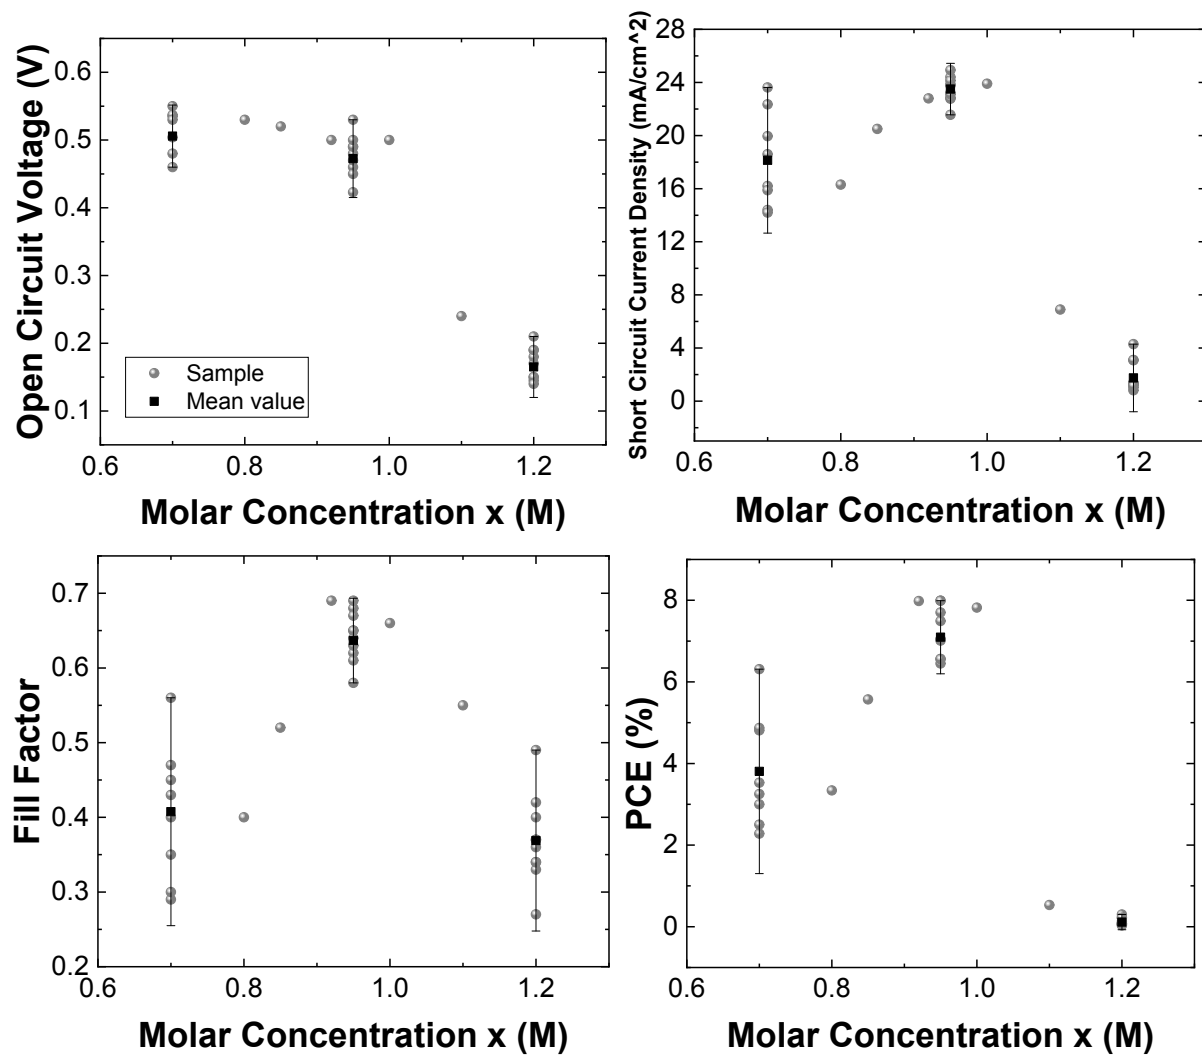

**Figure S8.** Statistics for  $V_{OC}$ ,  $J_{SC}$ , FF and PCE of devices with an active area of  $0.04 \text{ cm}^2$ . Note that: for the 0.70 M composition 8 samples were measured, for the 0.95 M composition 9 samples, and for the 1.20 M composition also 9 samples were measured. The graph includes the values from Table 1.

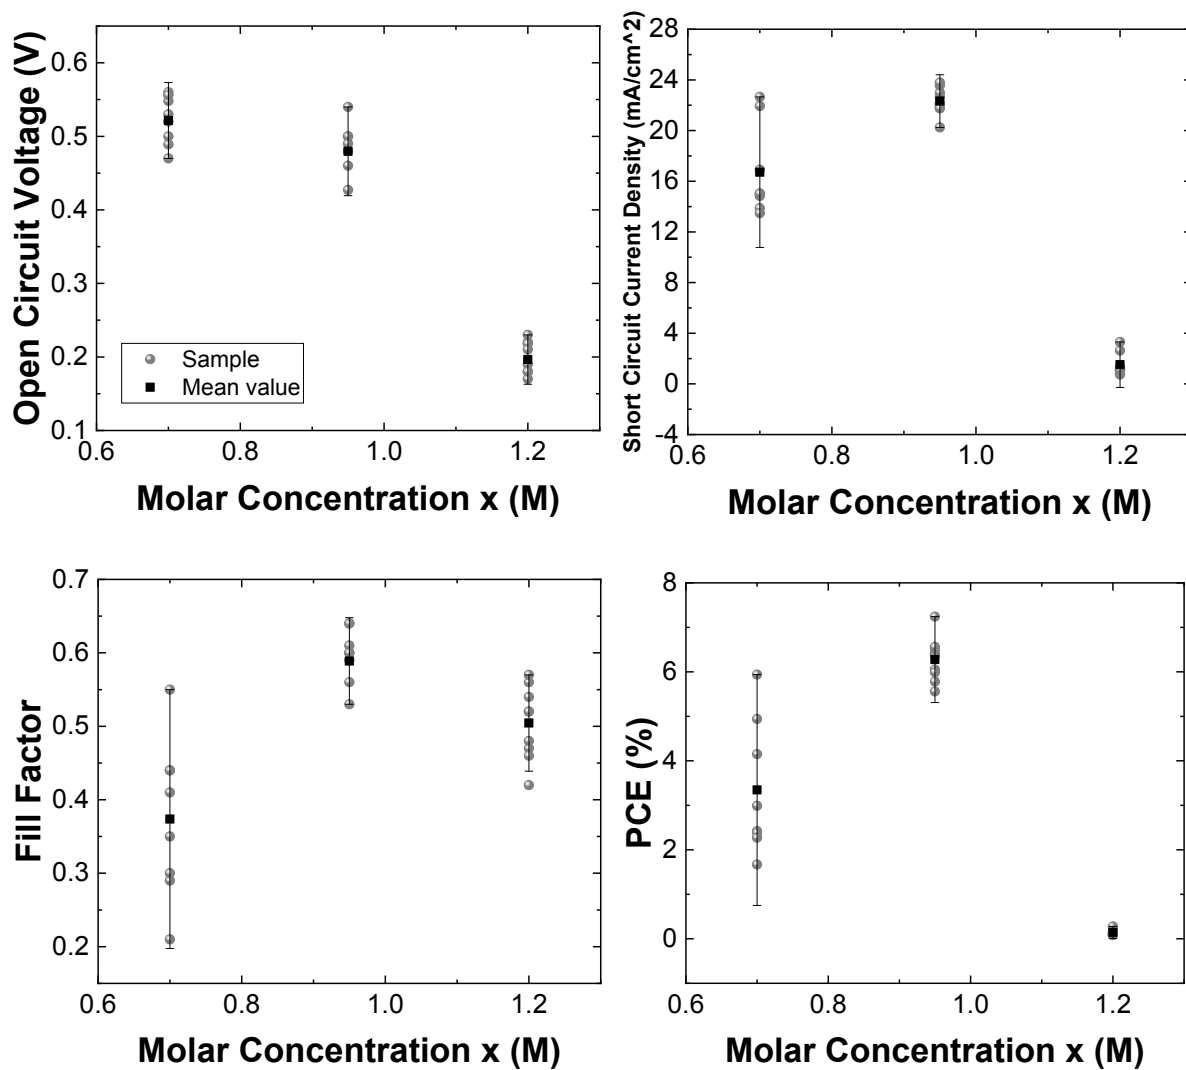

**Figure S9.** Statistics for  $V_{OC}$ ,  $J_{SC}$ , FF and PCE of devices with an active area of  $0.09 \text{ cm}^2$ . Note that: for the 0.70 M composition 8 samples were measured, for the 0.95 M composition 9 samples, and also for the 1.20 M composition 9 samples were measured.

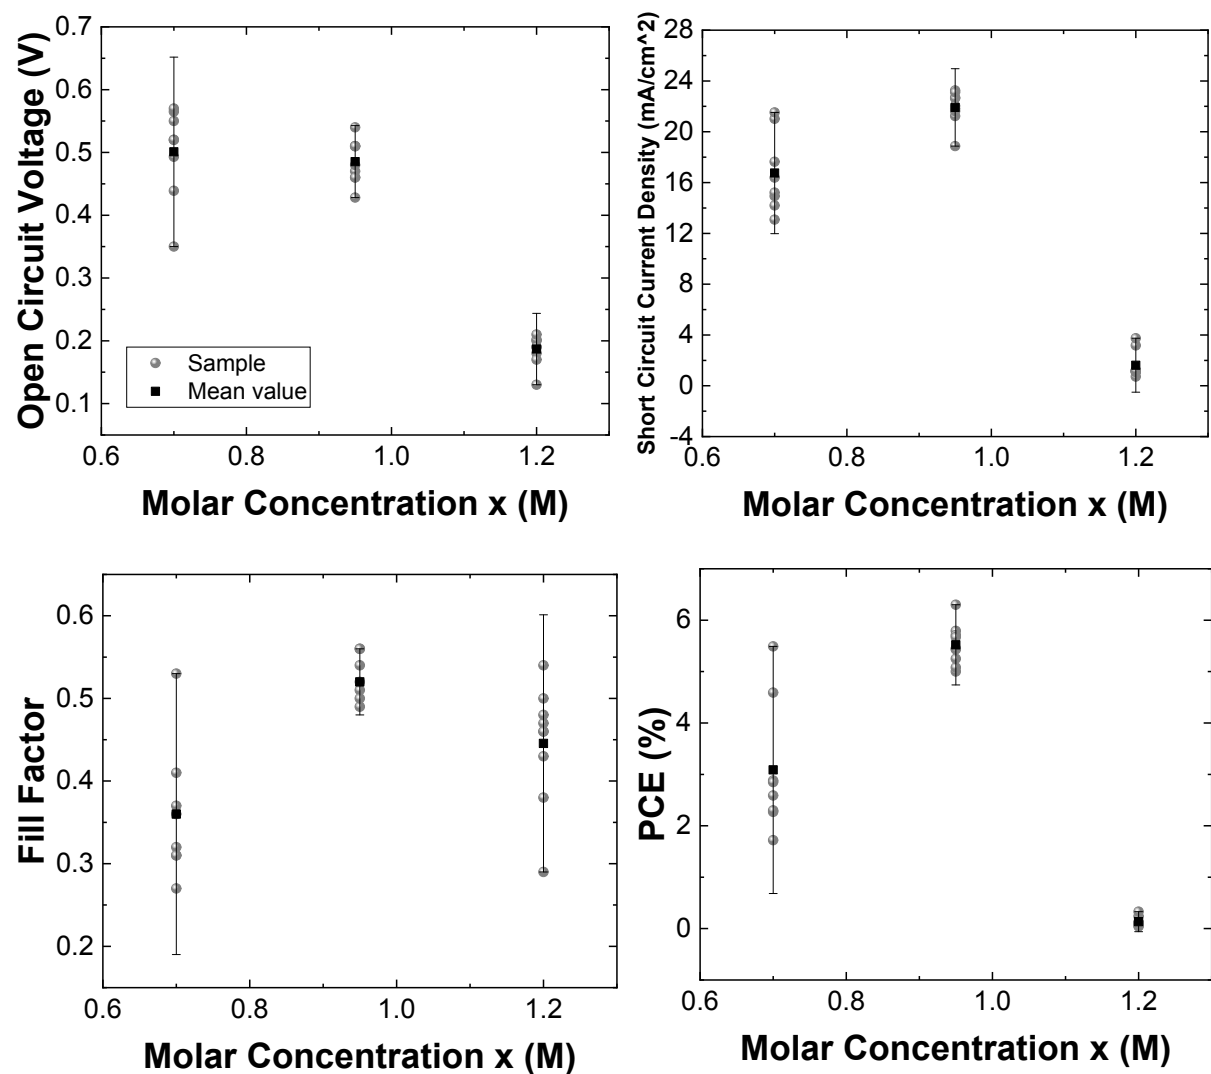

**Figure S10.** Statistics for  $V_{OC}$ ,  $J_{SC}$ , FF and PCE of devices using different 2D/3D films with an active area of  $0.25 \text{ cm}^2$ . Note that: for the 0.70 M composition 8 samples were measured, for the 0.95 M composition 9 samples, and also for the 1.20 M composition 9 samples were measured.

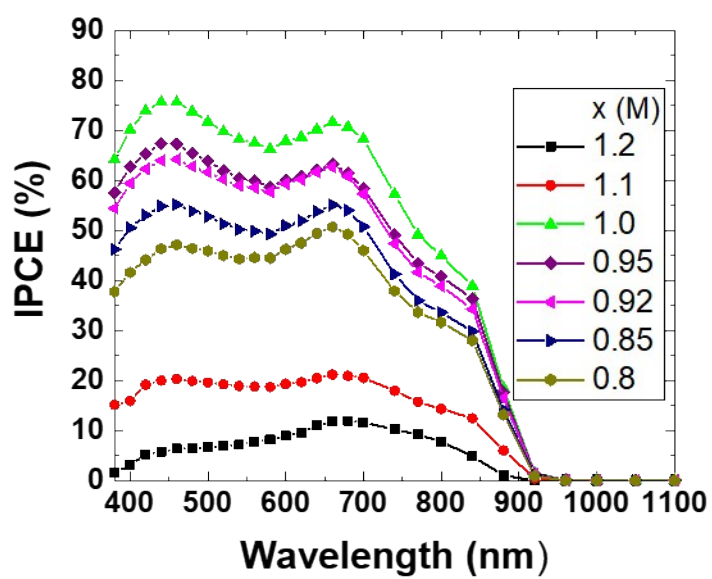

**Figure S11.** IPCE measurements of ITO/PEDOT:PSS/  $\text{PEA}_{0.08}\text{FA}_{(x)}\text{SnI}_3/\text{C60}/\text{BCP}/\text{Al}$  devices.

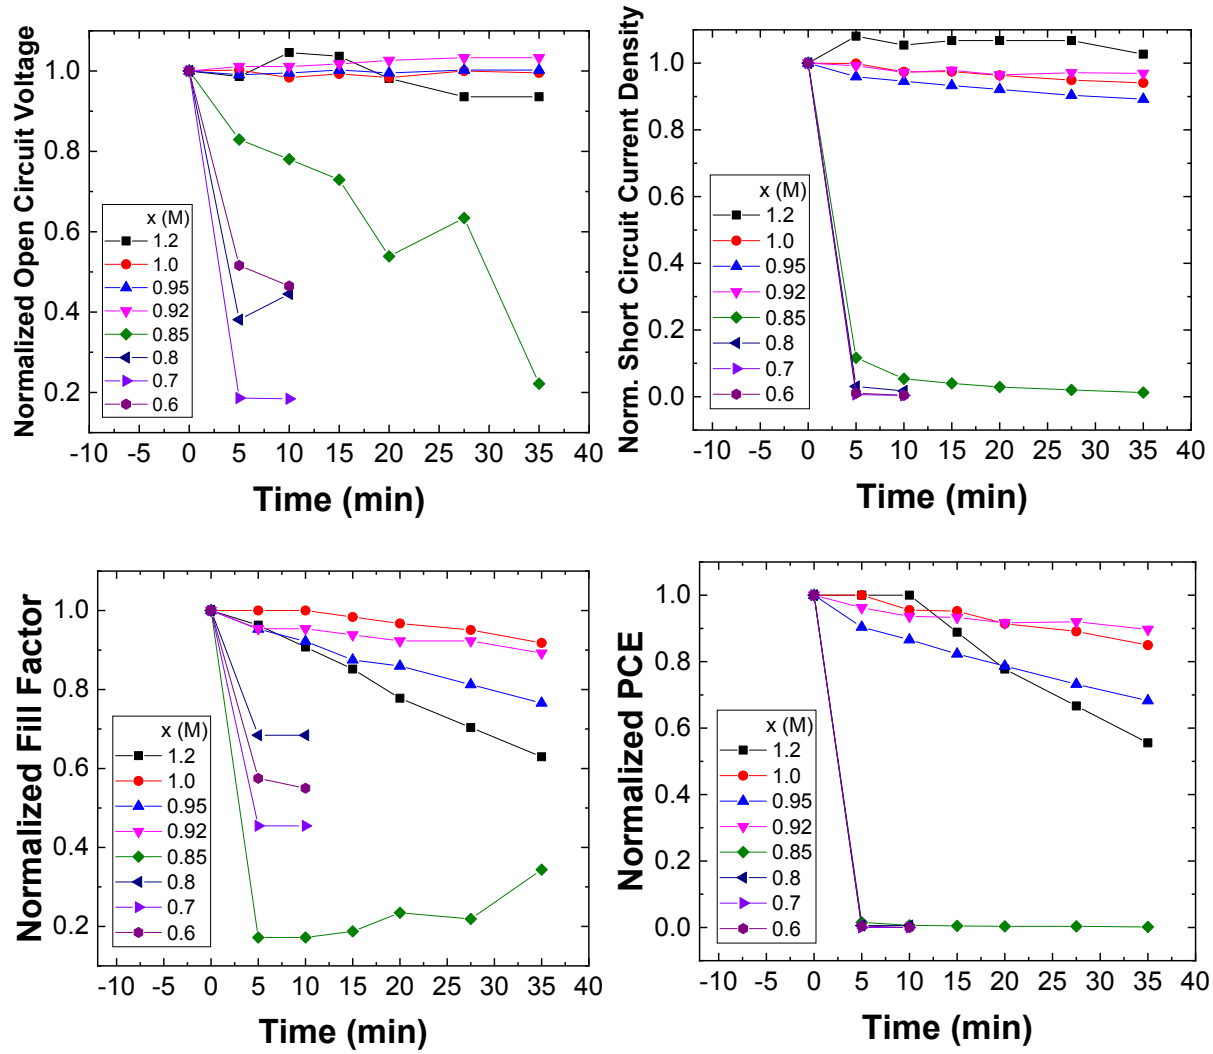

Figure 12. Variation of the  $V_{OC}$ ,  $J_{SC}$ , FF and PCE of devices using different 2D/3D films vs time they have been exposed to air.

#### References:

- [1] V. S. Kostko, O. V Kostko, G. I. Makovetskii and K. I. Yanushkevich, *Phys. status solidi*, 2002, **229**, 1349–1352.
